# Supplementary material for: Facile one-pot synthesis of flower-like ellagic acid microparticles incorporating anti-microbial peptides for enhanced wound healing
Source: Royal Society of Chemistry journal article supplement (doi:10.1039/d3tb02016a), 2023-12-01
Supplement: d3tb02016a1.pdf [file d3tb02016a1.pdf]

Supporting information

## **Facile One-pot Synthesis of Flower-like Ellagic Acid Microparticles**

### **Incorporating Anti-Microbial Peptides for Enhanced Wound Healing**

Guo Zhang,<sup>†a, b</sup> Yu Wang,<sup>†c</sup> Hua Qiu,<sup>\*d</sup> and Lei Lu<sup>\*a</sup>

a. School & Hospital of Stomatology, Wenzhou Medical University, Wenzhou, 325035, China.

b. Key Lab. of Advanced Technology for Materials of Education Ministry, School of Materials Science and Engineering, Southwest Jiaotong University, Chengdu, 610031, China.

c. Sichuan Engineering Research Center for Biomimetic Synthesis of Natural Drugs, School of Life Science and Engineering, Southwest Jiaotong University, Chengdu 610031, China.

d. Stomatologic Hospital and College, Key Laboratory of Oral Diseases Research of Anhui Province, Anhui Medical University, Hefei, Anhui 230032, China.

† These authors contributed equally to this work.

\* Corresponding authors: qiuhua1990@foxmail.com (H. Qiu); llu2@foxmail.com (L. Lu)

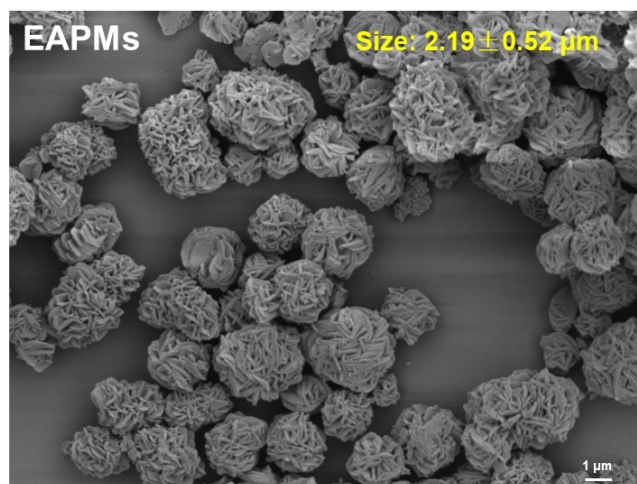

**Figure S1.** SEM image of EAMPs. The size of EAMPs was measured as  $2.19 \pm 0.52 \mu\text{m}$ .

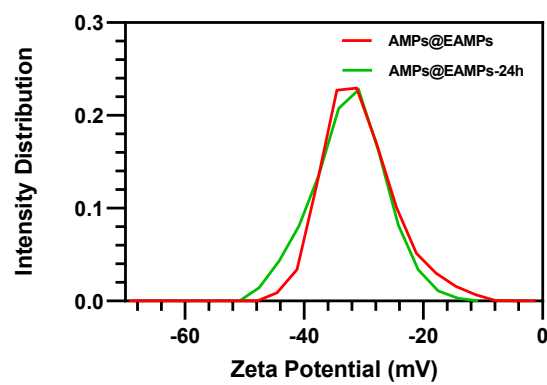

**Figure S2.** The surface charge of AMPs@EAMPs before and after 24 h incubation in PBS (pH 7.4) at  $37 \text{ }^\circ\text{C}$ .

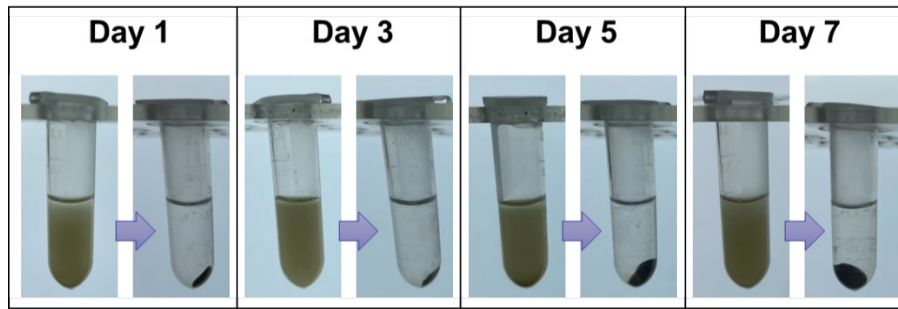

**Figure S3.** The long-term stability of 1 mg/mL AMPs@EAMPs during 7 days incubation in PBS (pH 7.4) at 37 °C. Left: AMPs@EAMPs solutions that were uniform, stable, and consistent in color during 7 days of incubation. Right: AMPs@EAMPs were completely separated by centrifugation, with the supernatant being clear

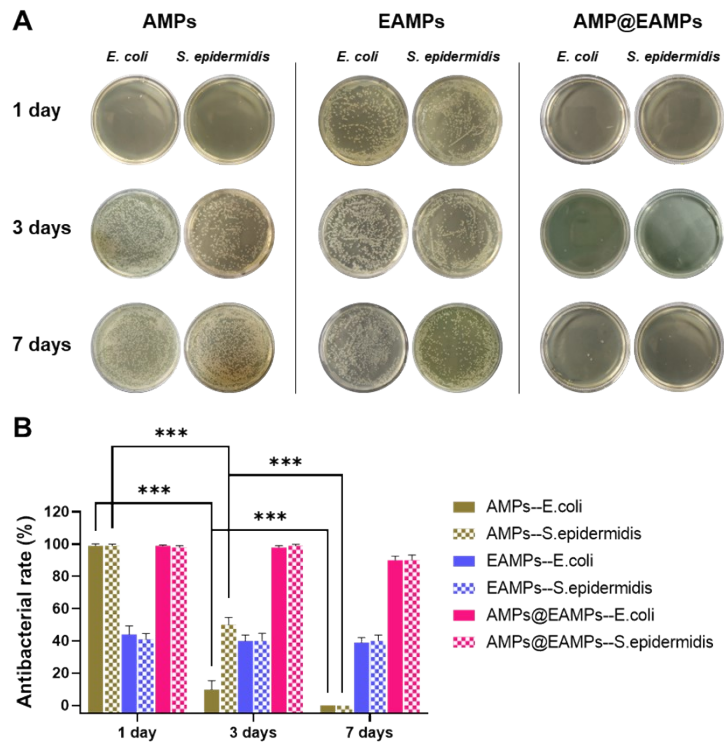

**Figure S4.** Reusability test of AMPs, EAMPs and AMPs@EAMPs after 1, 3, 7 days incubation with *E. coli* and *S. epidermidis*. (A) Agar plates observed after 24 h incubation of *E. coli* and *S. epidermidis* after treatments. (B) The statistical results of anti-bacterial rates. Data are presented as the mean  $\pm$  SD ( $n \geq 4$ ), \* $p < 0.05$ , \*\* $p < 0.01$ , \*\*\* $p < 0.001$ .

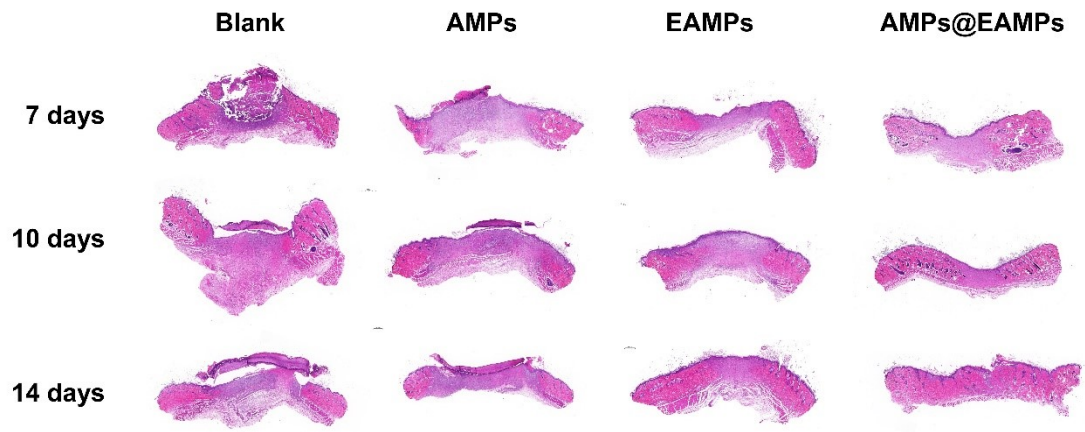

**Figure S5.** H&E images illustrating the progression of wound healing in the dorsal skin of rats at 7, 10, and 14 days after surgery.

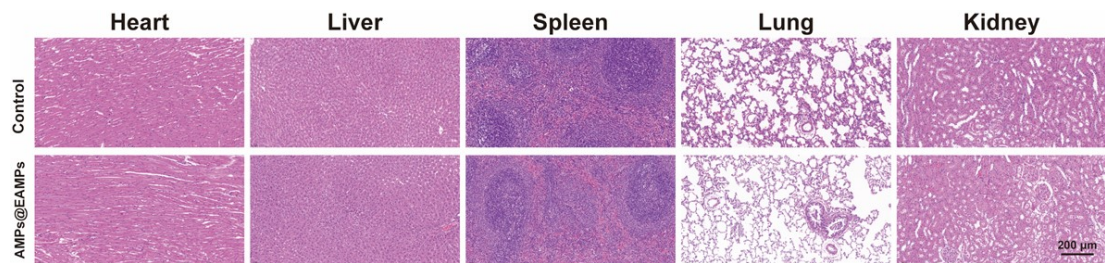

**Figure S6.** H&E-stained images of major organs (heart, liver, spleen, lung and kidney) extracted from the control and AMPs@EAMPs groups.
